# Supplementary material for: Syntheses, characterisation and some ligand substitution chemistry of Ru(ii)–diphosphine triflate complexes
Source: Royal Society of Chemistry journal article supplement (doi:10.1039/b306552a), 2003-01-01
Supplement: b306552a.doc [file b306552a.doc]

## **Supplementary information**

## The following supplementary information fully describes the syntheses and characterisation of the triflate complexes **1a–c** outlined briefly in the preliminary communication, 1 and also discusses the crystal structures of two aquo complexes which were the products of attempts to grow single crystals of the triflate complexes, one of which was also briefly mentioned in the preliminary communication.1

## Synthesis and characterization of triflate complexes

Treatment of *trans*–[RuCl2(L–L)2] (L–L = dppm, dppen) in 1,2–dichloroethane (DCE) at 50 ˚C with two equiv. of AgOTf gave orange–yellow *cis*–[Ru(OTf)2(L–L)2]·0.5CH2Cl2 (**1a–c**) after recrystallisation. The IR spectra of freshly–prepared Nujol mulls of **1a–c** showed no evidence of the presence of water. A strong band was present at 1345±10 cm–1, assigned to the asymmetric S-O stretching mode of coordinated OTf–, and there was no band at 1270 cm–1, the value for non–coordinated OTf–.2, 3 The mass spectra (FAB+) showed a cluster of peaks at the correct values for [M–OTf]+, and also showed a weaker cluster at [M+18–OTf]+. This is assigned to the presence of some *cis*–[Ru(OTf)(H2O)(L–L)2](OTf), formed from **1a–c** in the undried 3–nitrobenzyl alcohol used as matrix. The geometry of **1a–c** is unequivocally *cis* from the observation of two ‘virtual’ triplets (AA’XX’ spin system) in the 31P{1H} NMR spectra, consistent with our earlier observation that the addition of Ag+ salts to solutions of *trans*–[RuCl2(L–L)2] in DCE initially gives complexes containing *cis*–Ru(–Cl2)Ag units.4, 5 The resonances were somewhat broad; this may be due to exchange processes involving the weakly–coordinated OTf– ligands, as seen for related Ru(II)–tosylate (tosylate = –O3SC6H4Me–4) complexes.6 Interestingly, on addition of excess water (20 l) to a solution of **1a** in CDCl3, the colour lightened perceptibly, and the triplet at +9.0 p.p.m. shifted to +11.1 p.p.m., while the resonance at –18.9 p.p.m. shifted only to –18.5 p.p.m. The resonance at +9.0 p.p.m. is therefore assigned to P–*trans*–OTf, and the signal at +11.1 p.p.m. to P–*trans*–OH2, in *cis*–[Ru(H2O)2(dppm)2](OTf)2 formed on hydrolysis of **1a**. The 19F NMR spectra, in CDCl3, showed only one sharp singlet resonance at between –77 and –78 p.p.m. for **1a–c** even when strict precautions to exclude water were taken. This shifted slightly upfield (to *ca*. –80 p.p.m., the usual value for non–coordinated triflate) on the deliberate addition of excess water. Although static behaviour is sometimes seen for coordinated triflate by 19F NMR spectroscopy,7 it is more common for this ligand to undergo intra– and/or intermolecular exchange, including exchange with non–coordinated triflate or adventitious water, resulting in single sharp resonances, as seen here.8-10

*Structure of [Ru(OTf)(H2O)(dppm)2](OTf) (****S2a****)*

Efforts to grow crystals of **1a–b** resulted in the isolation of [Ru(OTf)(H2O)(dppm)2](OTf) (**S2a**) and [Ru(H2O)2(dppen)2](OTf)2 (**S2b**) although normal precautions to exclude water were taken; experimental details of the structure of **S2b** were published,1 although the structure was not discussed. We therefore include it here. The molecular structure of **S2a** is shown in Figure S1, key parameters from the data collection and structure refinement are shown in Table S1, and significant bond lengths and angles are shown in Table S2. The Ru–O(triflate) bond in **S2a** (2.231(7) Å) is rather long compared with values of 2.197(4) and 2.199(4) Å for the triflate *trans* to the dppe phosphorus donor in all–*cis*–[Ru(OTf)2(dppe)(CO)2] and [Ru(OTf)2(dppe)(H2O)(CO)] respectively,7 or 2.221(3) Å for triflate *trans* to the central P donor of *cis, mer*–[Ru(OTf)2({Cy2P(CH2)3}2PPh)(CO)]. 11 However, longer Ru(II)–triflate bonds are known, for example 2.299 Å in *trans*–[Ru(OTf)(CNH)(dppe)2](OTf),12 and 2.410(5) Å in *trans*–[Ru(OTf)(CN)(dppe)2] 13. The Ru–OH2 bond length, 2.194(3) Å, is similar to that found in, for example, [Ru(OTf)2(dppe)(H2O)(CO)] (2.198(5) Å), although somewhat longer than analogous values for the less crowded *fac*–[Ru(dppe)(CO)(H2O)3](OTf)2·1.8H2O (2.170(2), 2.180(2) Å). There is some evidence for a H–bonding interaction between the coordinated water of **S2a** and one oxygen atom of the coordinated triflate, and also between the coordinated water and two oxygens of the non–coordinated triflate anion. As expected, the Ru–P–*trans*–P bonds (2.3629(12), 2.3957(12) Å) are longer than the Ru­–P–*trans*–O bonds (2.2976(12), 2.2831(13) Å). The P–C–P angles (96.2(2)˚, 96.3(2)˚) are typical for chelating dppm. There is a clear – stacking interaction between two phenyl rings from the two *cis* P atoms of different dppm ligands (distance between *ipso* C’s 3.293 Å).

The molecular structure of **S2b** is shown in Figure S2, key parameters from the data collection and refinement are in Table S1 and the significant bond lengths and angles are shown in Table S3. The space group is orthorhombic, *Pbcn*, and a C2 axis bisects the O–Ru–O angle. As for **3a**, the Ru–P–*trans*–P bonds (2.3756(9) Å) are longer than the Ru­–P–*trans*–O bonds (2.3150(11) Å). The Ru–OH2 distance, 2.182(3) Å, is similar to that in **S2a**. A molecule of acetone, with the carbonyl oxygen H–bonded to one H of each coordinated water (H…O=C 1.908 Å), lies on the C2 axis. The other H on each coordinated water is H–bonded to a triflate anion oxygen atom (H…–O–SO2CF3 2.007 Å). Neither **S2a** nor **S2b** shows any intermolecular (cation–cation) hydrogen bonding.

## Experimental details

***cis*–[Ru(OTf)2(dppm)2],** **1a**: To *trans*–[RuCl2(dppm)2] (0.301 g, 0.320 mmol) in 1,2–dichloroethane (DCE) (50 cm3) was added fresh AgOTf (0.170 g, 0.66 mmol). The mixture was refluxed for 40 min., during which time the initially dark red solution cleared to yellow, and AgCl precipitated. The mixture was cooled to room temperature, filtered and evaporated to dryness. The yellow residue was recrystallised from CH2Cl2/hexanes. Yield 0.288 g, 77 %. Anal. Calcd. for C52H44F6O6P4RuS2·0.5CH2Cl2: C, 52.09; H, 3.75. Found: C, 52.00; H, 3.73. FAB MS: *m/z* 1036 (7) [M(H2O)–OTf]+, 1018 (100) [M–OTf]+, 869 (60) [M–2 OTf]+. Selected IR data (cm–1, Nujol) 1345; SO{asymm} coordinated OTf. 31P{1H} NMR data  (CH2Cl2): 9.0 (t, br, P–*trans*–P, *J*|AX+AX’| 73), –18.9 (t, br, P–*trans*–O). Attempted recrystallisation of **1a** from dichloromethane–hexane afforded *cis*–[Ru(OTf)(dppm)2(H2O)]OTf (**S2a**) which was characterized by X–Ray crystallography.

***cis*–[Ru(OTf)2(dppen)2],** **1b**: This was prepared (from*trans*–[RuCl2(dppen)2]) as for **1a**, in 74 % yield. Anal. Calcd. for C54H44F6O6P4RuS2·0.5CH2Cl2: C, 53.03; H, 3.67. Found: C, 52.26; H, 3.83. FAB MS: *m/z* 1043 (97) [M–OTf]+, 893 (100) [M–2 OTf]+. Selected IR data (cm–1, Nujol) 1345; SO{asymm} coordinated OTf. 31P{1H} NMR data  (CH2Cl2): 18.1 (s, br, P–*trans*–P), 1.0 (s, br, P–*trans*–OTf). Attempted recrystallisation of **1b** from acetone–diethyl ether afforded *cis*–[Ru(dppen)2(H2O)2](OTf)2·acetone (**S2b**) which was characterized by X–Ray crystallography.

***cis*–[Ru(OTf)2(dppe)2],** **1c**:This was prepared (from *trans*–[RuCl2(dppe)2]) as for **1a**, 79 % yield. Anal. Calcd. for C54H48F6O6P4RuS2·0.5CH2Cl2: C, 52.85; H, 3.99. Found: C, 52.66; H, 3.83. FAB MS: *m/z* 1064 (9) [M+H2O-OTf]+, 1047 (100) [M-OTf]+, 914 (18) [M+OH-2OTf]+, 897 (89) [M-2OTf–H]+. 31P{1H} NMR data  (CH2Cl2): 60.5 (t, *J*|AX+AX’| 34),  49.7 ppm (t). 19F NMR data  (CDCl3):  - 78.1 (s, coordinated OTf).

## Crystal structures

Single crystals of *cis*–[Ru(OTf)(H2O)(dppm)2](OTf) (**S2a**) and *cis*–[Ru(H2O)2(dppen)2](OTf)2 (**S2b**) suitable for X–Ray diffraction resulted from attempts to grow crystals of **1a** and **1b** respectively, from CH2Cl2/hexane, and acetone–diethyl ether, by slow solvent diffusion. Intensity data (Table S1) were collected using a STOE-IPDS image plate diffractometer (Mo–K, graphite monochromator,  = 0.71073 Å) at 213±2 K, in the  rotation scan mode. For **S2a** a total of 6477 unique reflections was measured, and for **S2b**, 3832 unique reflections were measured, and these were used in the refinements. The structures were solved by direct methods with the SHELXS97 package and refined using full–matrix least–squares on *F*2 (SHELXL97)14, 15. For **S2a**, refinement converged to *R* = 0.0382 for the reflections with *F*2 > 2(*F*2). For **S2b**, refinement converged to *R* = 0.0341 for the reflections with *F*2 > 2(*F*2).

## Supplementary material references

1 J. F. Bickley, S. J. Higgins, C. A. Stuart, and A. Steiner, *Inorg. Chem. Comm.*, 2000, **3**, 211.

2 G. A. Lawrance, *Chem. Revs.*, 1986, **86**, 17.

3 D. H. Johnston and D. F. Shriver, *Inorg. Chem.*, 1993, **32**, 1045.

4 S. J. Higgins, C. A. Stuart, and A. Mills, *Inorg. Chem. Comm.*, 2000, **3**, 208.

5 S. J. Higgins, A. A. La Pensée, C. A. Stuart, and J. M. Charnock, *J. Chem. Soc., Dalton Trans.*, 2001, 902.

6 O. H. Bailey and A. Ludi, *Inorg. Chem.*, 1985, **24**, 2582.

7 M. F. Mahon, M. K. Whittlesey, and P. T. Wood, *Organometallics*, 1999, **18**, 4068.

8 P. J. Stang, D. H. Cao, S. Saito, and A. M. Arif, *J. Am. Chem. Soc.*, 1995, **117**, 6273.

9 G. S. Hill, G. P. A. Yap, and R. J. Puddephatt, *Organometallics*, 1999, **18**, 1408.

10 G. Annibale, P. Bergamini, and M. Cattabriga, *Inorg. Chim. Acta*, 2001, **316**, 25.

11 P. W. Blosser, J. C. Gallucci, and A. Wojcicki, *Inorg. Chem.*, 1992, **31**, 2376.

12 T. P. Fong, A. J. Lough, R. H. Morris, A. Mezzetti, E. Rocchini, and P. Rigo, *J. Chem. Soc. Dalton Trans.*, 1998, 2111.

13 T. P. Fong, C. E. Forde, A. J. Lough, R. H. Morris, P. Rigo, E. Rocchini, and T. Stephan, *J. Chem. Soc. Dalton Trans.*, 1999, 4475.

14 G. M. Sheldrick, *Acta Cryst. A*, 1990, **46**, 467.

15 G. M. Sheldrick and T. R. Schneider, *Methods in Enzymology*, 1997, **277**, 319.

Captions to Figures

FIGURE S1

Molecular structure of *cis*–[Ru(OTf)(H2O)(dppm)2]OTf (**S2a**;cation). Ellipsoids drawn at the 50 % probability level.

FIGURE S2

Molecular structure of *cis*–[Ru(H2O)2(dppen)2](OTf)2 (**S2b**; cation). Ellipsoids drawn at the 50 % probability level.

**Table S1**

Crystallographic data, data collection and structure refinement for complexes **S2a** and **S2b**

|  | **S2a** | S2b | |
| --- | --- | --- | --- |
| Formula | C52H46F6O7P4RuS2 | | C57H54F6O9P4RuS2 |
| *M*, g mol–1 | 1185.96 | | 1286.07 |
| Crystal description | Yellow needle | | Yellow needle |
| *T*, K | 213(2) | | 213(2) |
| Crystal system/space group | Monoclinic, P 21/c | | Orthorhombic, *Pbcn* |
| *a*, Å; , ˚ | 22.109(3); 90.00 | | 15.043(2); 90.00 |
| *b*, Å; , ˚ | 11.4033(12); 114.936(15) | | 23.607(4); 90.00 |
| *c*, Å; , ˚ | 22.700(3); 90.00 | | 15.831(3); 90.00 |
| *V*, Å3; *Z* | 5189.4(12); 4 | | 5621.9(16); 4 |
| *D*c*,* g mol–1 | 1.518 | | 1.519 |
| *F*(000); (MoK), mm–1 | 2416; 0.579 | | 2632; 0.543 |
|  range, deg. | 1-22.5 | | 1–23.0 |
| *hkl* range | –23/23, –12/12, –24/24 | | –16/14, –24/25, –12/17 |
| No. unique diffractionsa | 6477 | | 3832 |
| No. observed reflections | 27325 | | 10995 |
| No. parameters | 657 | | 430 |
| *R*, *wR* for obs. diffractionsb | 0.0382, 0.0855 | | 0.0341; 0.0741 |
| *R, wR* all datab | 0.0588, 0.0907 | | 0.0608; 0.0799 |
| GOF for all data | 0.891 | | 0.878 |
| Residual electron density, e Å–3 | 0.74, -0.73 | | 0.6, –0.4 |

a Diffractions with *F*2 > 2(*F*2). b Weighting scheme: (**A**) *w*=1/[2(*F*o2)+(0.0500*P*)2], *P* = (*F*o2 + 2*F*c2)/3 (**B**) *w*=1/[2(*F*o2)+(0.0459*P*)2], *P* = (*F*o2 + 2*F*c2)/3.

*R(F)* = || *F*o | – | *F*c ||/ | *F*o |, *wR*(*F*2) = [(*w*( *F*o2 –  *F*c2)2/*w*(*F*o2)2)]1/2.

c GOF = [(*w*( *F*o2 –  *F*c2)2)/(*N*diffrs – *N*params)]1/2.

**Table S2**

Significant bond lengths (Å) and angles (˚) for **S2a**.

| Ru(1)-P(1) | 2.3629(12) | Ru(1)–P(2) | 2.2976(12) |
| --- | --- | --- | --- |
| Ru(1)–P(3) | 2.2831(13) | Ru(1)–P(4) | 2.3957(12) |
| Ru(1)–O(1) | 2.231(3) | Ru(1)–O(7) | 2.194(3) |
|  |  |  |  |
| P(1)–Ru(1)–P(2) | 72.06(4) | P(3)–Ru(1)–P(4) | 71.92(4) |
| P(1)–C(13)–P(2) | 96.2(2) | P(3)–C(38)–P(4) | 96.3(2) |
| Ru(1)–O(1)–S(1) | 131.50(19) | P(1)–Ru(1)–P(4) | 170.48(4) |
| P(2)–Ru(1)–O(7)) | 166.42(9) | P(3)–Ru(1)–O(1) | 168.59(8) |

**Table S3**

Significant bond lengths (Å) and angles (˚) for **S2b**.

| Ru(1)-P(1) | 2.3151(11) | Ru(1)–P(2) | 2.3756(9) |
| --- | --- | --- | --- |
| Ru(1)–O(5) | 2.182(3) | P(1)–C(13) | 1.822(4) |
| P(2)–C(13) | 1.816(4) | C(13)–C(14) | 1.334(6) |
|  |  |  |  |
| P(1)–Ru(1)–P(2) | 72.85(4) | P(2)–C(13)–P(1) | 99.9(2) |
| P(1)–Ru(1)–P(1’) | 104.54(5) | P(1)–Ru(1)–O(5) | 87.72(9) |
| O(5)–Ru(1)–O(5’) | 82.91(16) | P(2)–Ru(1)–P(2’) | 171.86(4) |
| P(1)–Ru(1)–O(5’) | 163.16(9) |  |  |
