# Supplementary figures and images for: Syntheses, characterisation and some ligand substitution chemistry of Ru(ii)–diphosphine triflate complexes
Source: Royal Society of Chemistry journal article supplement (doi:10.1039/b306552a), 2003-01-01

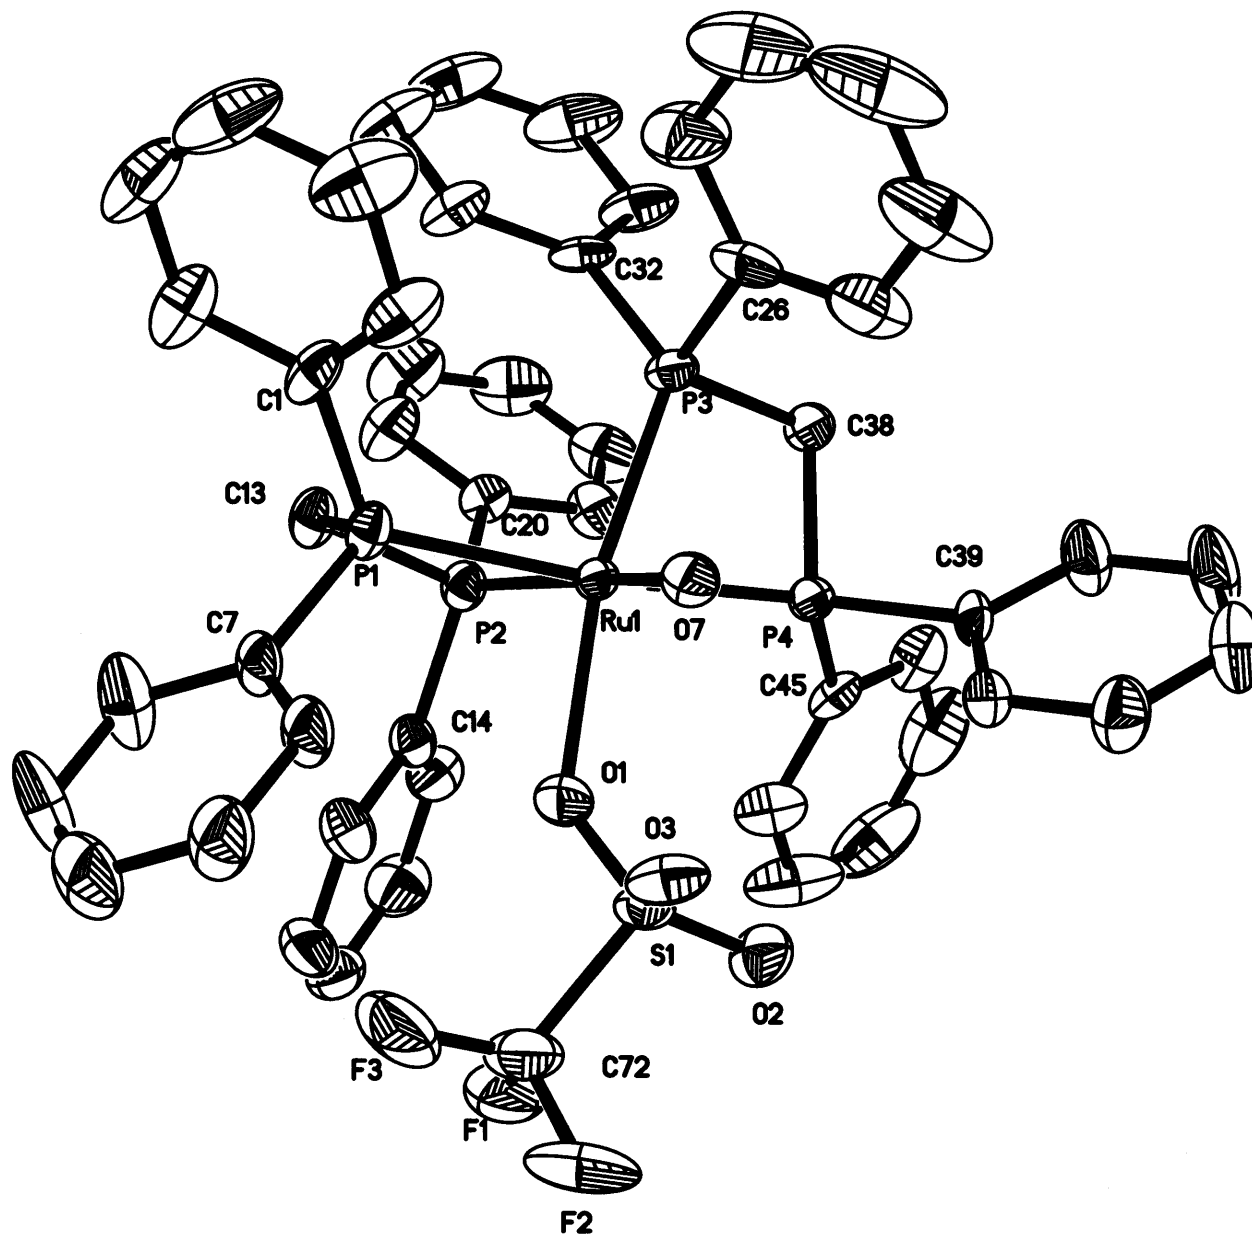

Supplement: b306552a-s1.pdf [file b306552a-s1.pdf]

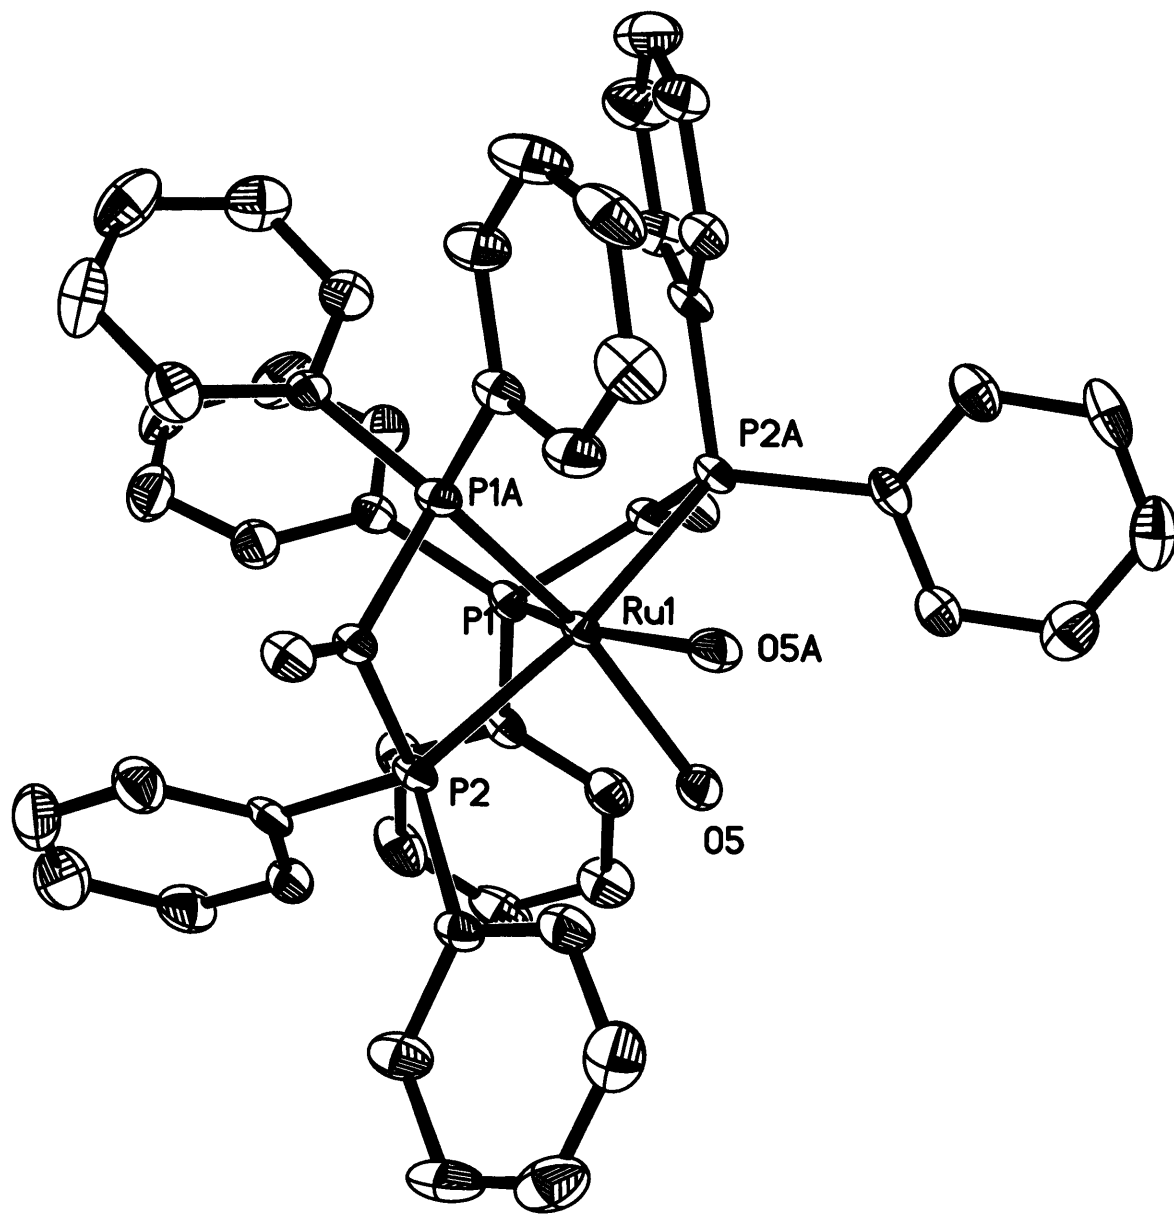

Supplement: b306552a-s2.pdf [file b306552a-s2.pdf]
